# Supplementary material for: Divergent roles for antigenic drive in the aetiology of primary versus dasatinib-associated CD8+ TCR-Vβ+ expansions
Source: PubMed Central journal article supplement (PMC5803196; doi:10.1038/s41598-017-18062-x), 2018-02-07
Supplement: 41598_2017_18062_MOESM1_ESM.pdf [file 41598_2017_18062_MOESM1_ESM.pdf]

## SUPPLEMENTARY INFORMATION

### **Divergent roles for antigenic drive in the aetiology of primary versus dasatinib-associated CD8<sup>+</sup> TCR-V $\beta$ <sup>+</sup> expansions**

Anna Lissina<sup>1\*</sup>, James E. McLaren<sup>2\*</sup>, Mette Ilander<sup>3</sup>, Emma I. Andersson<sup>3</sup>, Catherine S. Lewis<sup>1</sup>, Mathew Clement<sup>2</sup>, Andrew Herman<sup>1</sup>, Kristin Ladell<sup>2</sup>, Sian Llewellyn-Lacey<sup>2</sup>, Kelly L. Miners<sup>2</sup>, Emma Gostick<sup>2</sup>, J. Joseph Melenhorst<sup>4</sup>, A. John Barrett<sup>4</sup>, David A. Price<sup>2\*</sup>, Satu Mustjoki<sup>3\*</sup>, Linda Wooldridge<sup>1\*</sup>

<sup>1</sup>Faculty of Health Sciences, University of Bristol, Biomedical Sciences Building, Bristol, UK

<sup>2</sup>Institute of Infection and Immunity, Cardiff University School of Medicine, Heath Park, Cardiff, UK

<sup>3</sup>Hematology Research Unit Helsinki, Department of Clinical Chemistry and Hematology, University of Helsinki and Helsinki University Hospital Comprehensive Cancer Center, Helsinki, Finland

<sup>4</sup>Stem Cell Allogeneic Transplantation Section, Hematology Branch, National Heart, Lung, and Blood Institute, National Institutes of Health, Bethesda, Maryland, USA

\*These authors contributed equally to this manuscript.

Correspondence: Dr Anna Lissina, Faculty of Health Sciences, University of Bristol, Biomedical Sciences Building, University Walk, Bristol BS8 1TD, UK.

E-mail: a.lissina@bristol.ac.uk

## Supplementary Figure Legends

**Supplementary Figure 1.** Identification of dominant CD8<sup>+</sup> TCR-V $\beta$ <sup>+</sup> expansions in T-LGLL and dasatinib-treated CML patients. Representative anti-TCR-V $\beta$  screening profiles are shown for the indicated T-LGLL (left panel) and dasatinib-treated CML patients (right panel).

**Supplementary Figure 2.** Clonotypic analysis of dominant CD8<sup>+</sup> TCR-V $\beta$ <sup>+</sup> expansions in T-LGLL patients. **(A)** Percent frequencies of expanded (TCR-V $\beta$ <sup>+</sup>) CD8<sup>+</sup> T-cell clonotypes sorted directly *ex vivo* from T-LGLL patients. **(B)** Percent frequencies of expanded (TCR-V $\beta$ <sup>+</sup>) CD8<sup>+</sup> T-cell clonotypes restimulated twice *in vitro* over a period of 1 month after sorting from T-LGLL patients. Gene usage and CDR3 $\beta$  amino acid sequences are listed, and dominant *ex vivo* clonotypes are highlighted in color.

# Supplementary Figure 1

T-LGLL

Dasatinib-treated

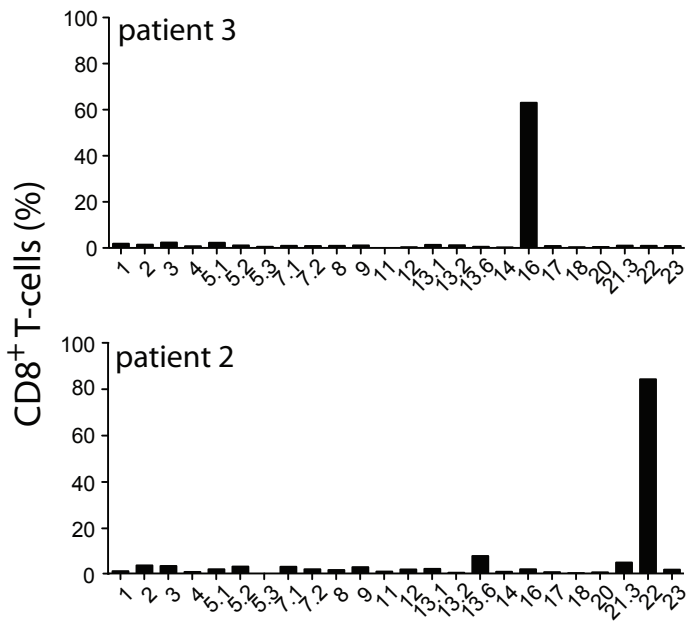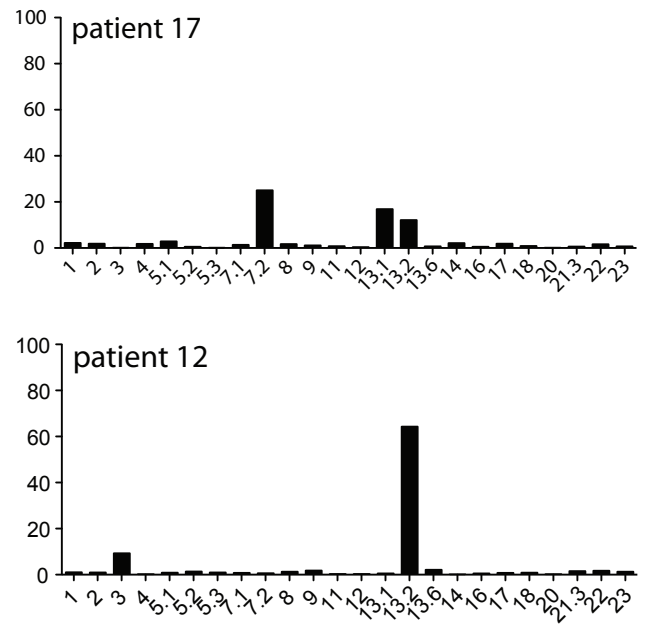

TCR-Vβ antibody

# Supplementary Figure 2

**A**

*Ex vivo*

| Patient ID | TRBV | CDR3 $\beta$   | TRBJ | Freq (%) |
|------------|------|----------------|------|----------|
| 1          | 9    | CASSVGIGHEQY   | 2-7  | 100.00   |
|            | 14   | CASSLGQGW SPLH | 1-6  | 100.00   |

**B**

*After in vitro culture*

| Patient ID | TRBV | CDR3 $\beta$       | TRBJ | Freq (%) |
|------------|------|--------------------|------|----------|
| 1          | 9    | CASSVHSSTYEQY      | 2-7  | 25.00    |
|            | 9    | CASSEGTSDDTDQY     | 2-3  | 14.71    |
|            | 9    | CASSVEGYNEQF       | 2-1  | 13.24    |
|            | 9    | CASSISGSGEQF       | 2-1  | 11.76    |
|            | 9    | CASSTSTGTNQPQH     | 1-5  | 10.29    |
|            | 9    | CASSVDTSNQPQH      | 1-5  | 7.35     |
|            | 9    | CASSTSGQALEAF      | 1-1  | 7.35     |
|            | 9    | CASTGGLNYGYT       | 1-2  | 4.41     |
|            | 9    | CASSVGQGQETQY      | 2-5  | 2.94     |
|            | 9    | CASSVGQGQETQY      | 2-5  | 1.47     |
| 3          | 14   | CASSQDLGTRFEVQY    | 2-4  | 64.20    |
|            | 14   | CASSQAPRNPNYGYT    | 1-2  | 13.58    |
|            | 14   | CASSQGFNEQF        | 2-1  | 9.88     |
|            | 14   | CASSQTSRRLNEQF     | 2-1  | 3.70     |
|            | 14   | CASSHPRNPGGGNTGELF | 2-2  | 2.47     |
|            | 14   | CASSLESDDTDQY      | 2-3  | 2.47     |
|            | 14   | CASSQVGDEQF        | 2-1  | 2.47     |
|            | 14   | CASSPGRTDTQY       | 2-3  | 1.23     |

| Patient ID | Leukemia type | Dominant TCR-V $\beta$ expansion (Arden) | CD8 <sup>+</sup> TCR-V $\beta$ <sup>+</sup> T-cells (%) before dasatinib | CD8 <sup>+</sup> TCR-V $\beta$ <sup>+</sup> T-cells (%) 1 hour post-dasatinib | Lymphocyte count (x10 <sup>9</sup> /L) before dasatinib | Lymphocyte count (x10 <sup>9</sup> /L) 1 hour post-dasatinib | CMV serostatus |
|------------|---------------|------------------------------------------|--------------------------------------------------------------------------|-------------------------------------------------------------------------------|---------------------------------------------------------|--------------------------------------------------------------|----------------|
| 12         | CML           | 13.2                                     | 66.4                                                                     | 69.2                                                                          | 0.88                                                    | 2.64                                                         | Positive       |
| 13         | CML           | 14                                       | 14                                                                       | 13.3                                                                          | 1.39                                                    | 3.94                                                         | Positive       |
| 14         | CML           | 3                                        | 10.3                                                                     | 10.7                                                                          | 3.09                                                    | 4.96                                                         | Positive       |
| 15         | CML           | 3                                        | 11.5                                                                     | 13.2                                                                          | 1.68                                                    | 5.39                                                         | Positive       |
| 16         | CML           | 5.3                                      | 1.2                                                                      | 23.7                                                                          | 0.85                                                    | 0.78                                                         | Negative       |
| 17         | CML           | 7.2                                      | 25                                                                       | 26.5                                                                          | 2.49                                                    | 4.81                                                         | Positive       |
| 18         | CML           | 2                                        | 13.1                                                                     | 15.1                                                                          | 1.88                                                    | 6.12                                                         | NA             |
| 18         | CML           | 8                                        | 12.6                                                                     | 12.6                                                                          | 1.88                                                    | 6.12                                                         | NA             |
| 19         | CML           | 22                                       | 10.8                                                                     | 12.6                                                                          | 1.85                                                    | 3.05                                                         | Negative       |
| 19         | CML           | 23                                       | 9.6                                                                      | 10.9                                                                          | 1.85                                                    | 3.05                                                         | Negative       |
| 20         | CML           | 2                                        | 8.6                                                                      | 11.8                                                                          | 2.7                                                     | 5.6                                                          | Negative       |
| 21         | CML           | 14                                       | 11.6                                                                     | 14.1                                                                          | 1.19                                                    | 4.05                                                         | Positive       |

**Supplementary Table 1A:** Additional clinical details of dasatinib-treated CML patients. NA: not available.

| Patient ID | Leukemia type | Time of sampling relative to dasatinib administration | CMV IgG (aU/mL) | CMV serostatus |
|------------|---------------|-------------------------------------------------------|-----------------|----------------|
| 12         | CML           | -                                                     | 107             | Positive       |
| 13         | CML           | 0 hours (before dasatinib)                            | 44              | Positive       |
| 14         | CML           | 2 hours post-dasatinib                                | 70              | Positive       |
| 15         | CML           | 1 hour post-dasatinib                                 | 102             | Positive       |
| 16         | CML           | 1 hour post-dasatinib                                 | 0               | Negative       |
| 17         | CML           | NA                                                    | 72              | Positive       |
| 18         | CML           | 2 hours post-dasatinib                                | NA              | NA             |
| 19         | CML           | 1 hour post-dasatinib                                 | <4              | Negative       |
| 20         | CML           | 1 hour post-dasatinib                                 | <4              | Negative       |
| 21         | CML           | NA                                                    | >250            | Positive       |

**Supplementary Table 1B:** Time of sampling relative to dasatinib administration for patients shown in Supplementary Table 1A. NA: not available.
